# Supplementary material for: Development of a Multiplex PCR Assay for Efficient Detection of Two Potential Probiotic Strains Using Whole Genome-Based Primers
Source: MDPI journal article supplement (doi:10.3390/microorganisms11102553), 2023-10-13
Supplement: s1 [file s1]

**Table S5:** Unintended products generated by the primer pairs designed to detect *Lp. plantarum* L125 and *Lp. pentosus* L33 in other bacteria.

| Primer code   | Unintended products (Size in bp)                            |
|---------------|-------------------------------------------------------------|
| L125 6.2F/R   | <i>Massilia cavernae</i> K1S02-61 (2125)                    |
| L125 10.16F/R | <i>Paenibacillus silvestris</i> 5J-6 (3537)                 |
|               | <i>Maridesulfovibrio zosterae</i> DSM 11974 (2525)          |
|               | <i>Eoetvoesiella caeni</i> DSM 25520 (254)                  |
|               | <i>Desulfosarcina cetonica</i> JCM 12296 (1956)             |
|               | <i>Pedobacter foliorum</i> LMG 31463 (2279)                 |
|               | <i>Neobacillus fumarioli</i> NBRC 102428 (3192)             |
| L125 12.1F/R  | <i>Moorella sulf tireducens</i> SLA38 2 (2996)              |
| L33 2.2F/R    | None                                                        |
| L33 6.5F/R    | <i>Tetragenococcus koreensis</i> KCTC 3924 (149)            |
|               | <i>Desulfonatronovibrio magnus</i> AHT22 LZ23 (591)         |
|               | <i>Deinococcus ficus</i> CC-FR2-10 (3190 & 2059)            |
|               | <i>Gramella crocea</i> YB25 23 (1750)                       |
|               | <i>Gracilibacillus salitolerans</i> SCU50 (1120)            |
|               | <i>Leptolyngbya ohadii</i> IS1 (790)                        |
|               | <i>Lactiplantibacillus pentosus</i> KW1 (380)               |
|               | <i>Geobacter</i> sp. DSM 9736 (3336)                        |
| L33 9.8F/R    | <i>Mycobacterium shinjukuense</i> JCM 14233 (3176)          |
|               | <i>Dyella flava</i> DHOC52 (3434)                           |
|               | <i>Pelagicoccus enzymogenes</i> NFK12 191 (3906)            |
|               | <i>Alkaliflexus imshenetskii</i> DSM 15055 (3591)           |
|               | <i>Taibaiella chishuiensis</i> CGMCC (1902)                 |
|               | <i>Candidatus Viridilinea mediisalina</i> Kir15-3F (3057)   |
|               | <i>Planococcus donghaensis</i> DSM 22276 (1277)             |
|               | <i>Cognaticolwellia aestuarii</i> CGMCC1.6965 (781)         |
|               | <i>Mucilaginibacter roseus</i> LMG 28454 (947)              |
|               | <i>Lactococcus hodotermopsidis</i> Hs30E4-3 (3451)          |
|               | <i>Chryseobacterium manosquense</i> Marseille-Q2069 (2062)  |
|               | <i>Leptospira montravelensis</i> 201800278 (2254)           |
|               | <i>Levilactobacillus brevis</i> NSMJ23 plasmid pLBN-3 (245) |
